# Supplementary material for: Mediterranean diet intervention in overweight and obese subjects lowers plasma cholesterol and causes changes in the gut microbiome and metabolome independently of energy intake
Source: HighWire-hosted journal article supplement (doi:10.1136/gutjnl-2019-320438), 2020-02-19
Supplement: gutjnl-2019-320438supp004_data_supplement.pdf [file gutjnl-2019-320438supp004_data_supplement.pdf]

**Supplementary Table 2** Mass Spectrometry characteristics of compounds monitored by targeted analysis through Liquid Chromatography - Tandem Mass Spectrometry (LC/MS/MS) in blood and urine samples collected over the study period.

| <b>Compound</b> | <b>Precursor ion</b><br><b>[M+H]<sup>+</sup> <i>m/z</i></b> | <b>Product ions</b><br><b>[M+H]<sup>+</sup> <i>m/z</i></b> |
|-----------------|-------------------------------------------------------------|------------------------------------------------------------|
| TMAO            | 76                                                          | 58                                                         |
| TMAO-d9         | 85                                                          | 66                                                         |
| Betaine         | 118                                                         | 59                                                         |
| Carnitine       | 162                                                         | 103; 85; 60                                                |
| Choline         | 104                                                         | 60                                                         |
| Creatinine      | 114                                                         | 44                                                         |

TMAO: trimethylamine n-oxide; TMAO-d9: deuterium-labeled methyl d9-TMAO. *m/z*, mass-to-charge.
