# Supplementary material for: Mediterranean diet intervention in overweight and obese subjects lowers plasma cholesterol and causes changes in the gut microbiome and metabolome independently of energy intake
Source: HighWire-hosted journal article supplement (doi:10.1136/gutjnl-2019-320438), 2020-02-19
Supplement: gutjnl-2019-320438supp007_data_supplement.pdf [file gutjnl-2019-320438supp007_data_supplement.pdf]

**Supplementary Table 5** List of contrasted MSP species and Spearman correlations with MD index by time point. Reporting of contrasted MSP between ConD and MedD groups at each timepoint (after 20% occurrence filter) with their enrichment status, pvalues from Wilcoxon rank sum tests (pvalue<sub>w</sub>) and after adjustment for multiple comparisons using the Benjamini-Hochberg procedure (qvalue<sub>w</sub>), Spearman Rho and pvalue<sub>s<sub>p</sub></sub> calculated with MD index score and the respective status based on Venn diagram results (status VD).

| MSP      | Phylum         | Species annotation                     | Baseline    |                     |                     |        |                                 | Status VD           |
|----------|----------------|----------------------------------------|-------------|---------------------|---------------------|--------|---------------------------------|---------------------|
|          |                |                                        | Enriched in | pvalue <sub>w</sub> | qvalue <sub>w</sub> | Rho    | pvalue <sub>s<sub>p</sub></sub> |                     |
| msp_0713 | Firmicutes     | <i>Clostridium citroniae</i>           | ConD        | 0,001               | 0,19                | -0,007 | 0,96                            | baseline and 4w     |
| msp_0056 | Firmicutes     | <i>unclassified Clostridiales</i>      | ConD        | 0,002               | 0,19                | 0,015  | 0,90                            | baseline, 4w and 8w |
| msp_0172 | Firmicutes     | <i>Ruthenibacterium lactatiformans</i> | ConD        | 0,002               | 0,19                | 0,138  | 0,29                            | baseline, 4w and 8w |
| msp_0066 | Firmicutes     | <i>Clostridium</i> sp. AT4             | ConD        | 0,003               | 0,19                | -0,183 | 0,15                            | baseline, 4w and 8w |
| msp_0009 | Firmicutes     | <i>Clostridium bolteae</i>             | ConD        | 0,009               | 0,35                | 0,015  | 0,91                            | baseline            |
| msp_0335 | Bacteroidetes  | <i>unclassified Alistipes</i>          | ConD        | 0,011               | 0,39                | -0,262 | 0,04                            | baseline, 4w and 8w |
| msp_0263 | Actinobacteria | <i>Bifidobacterium adolescentis</i>    | ConD        | 0,017               | 0,49                | -0,066 | 0,61                            | baseline and 8w     |
| msp_1541 | Firmicutes     | <i>unclassified Clostridiales</i>      | ConD        | 0,021               | 0,49                | 0,016  | 0,90                            | baseline and 4w     |
| msp_0020 | Firmicutes     | <i>Clostridium clostridioforme</i> 1   | ConD        | 0,022               | 0,49                | -0,174 | 0,18                            | baseline and 4w     |
| msp_0014 | Firmicutes     | <i>Eisenbergiella tayi</i>             | ConD        | 0,028               | 0,51                | 0,153  | 0,24                            | baseline, 4w and 8w |
| msp_0318 | Bacteroidetes  | <i>Alistipes indistinctus</i>          | ConD        | 0,043               | 0,61                | -0,027 | 0,84                            | baseline and 4w     |
| msp_0164 | Firmicutes     | <i>Ruminococcus</i> sp.                | MedD        | 0,003               | 0,19                | 0,140  | 0,28                            | baseline, 4w and 8w |
| msp_0979 | NA             | NA                                     | MedD        | 0,004               | 0,19                | 0,244  | 0,06                            | baseline, 4w and 8w |
| msp_0265 | Firmicutes     | <i>unclassified Faecalibacterium</i>   | MedD        | 0,004               | 0,19                | -0,004 | 0,97                            | baseline, 4w and 8w |
| msp_0586 | Firmicutes     | <i>Clostridium</i> sp. CAG:343         | MedD        | 0,004               | 0,19                | 0,306  | 0,02                            | baseline            |
| msp_0285 | Firmicutes     | <i>Clostridium</i> sp. CAG:217         | MedD        | 0,022               | 0,49                | 0,009  | 0,95                            | baseline, 4w and 8w |
| msp_0133 | Firmicutes     | <i>Coprococcus</i> sp.                 | MedD        | 0,022               | 0,49                | 0,149  | 0,25                            | baseline and 4w     |
| msp_0820 | Firmicutes     | <i>unclassified Clostridiales</i>      | MedD        | 0,023               | 0,49                | 0,277  | 0,03                            | baseline, 4w and 8w |
| msp_0679 | Firmicutes     | <i>unclassified Firmicutes</i>         | MedD        | 0,024               | 0,49                | 0,040  | 0,76                            | baseline, 4w and 8w |
| msp_0906 | Firmicutes     | <i>Clostridium</i> sp.                 | MedD        | 0,025               | 0,49                | 0,041  | 0,75                            | baseline, 4w and 8w |
| msp_0189 | Firmicutes     | <i>Blautia</i> sp. CAG:237             | MedD        | 0,029               | 0,51                | 0,166  | 0,20                            | baseline, 4w and 8w |
| msp_0893 | Firmicutes     | <i>Faecalibacterium prausnitzii</i> 2  | MedD        | 0,032               | 0,51                | 0,034  | 0,79                            | baseline            |
| msp_0087 | Firmicutes     | <i>Lactobacillus rogosae</i>           | MedD        | 0,033               | 0,51                | 0,264  | 0,04                            | baseline            |

---

|           |            |                                       |      |       |      |       |      |                     |
|-----------|------------|---------------------------------------|------|-------|------|-------|------|---------------------|
| msp_0639  | Firmicutes | <i>Faecalibacterium prausnitzii</i> 6 | MedD | 0,034 | 0,51 | 0,096 | 0,46 | baseline, 4w and 8w |
| msp_1428  | Firmicutes | <i>unclassified Clostridiales</i>     | MedD | 0,047 | 0,61 | 0,155 | 0,23 | baseline            |
| msp_1643c | Firmicutes | <i>Ruminococcus</i> sp. JC304         | MedD | 0,048 | 0,61 | 0,258 | 0,04 | baseline, 4w and 8w |
| msp_0153  | Firmicutes | <i>Erysipelatoclostridium ramosum</i> | MedD | 0,048 | 0,61 | 0,146 | 0,26 | baseline            |

---

Total Number MSP species at baseline= 1065

## 4w

| MSP      | Phylum        | Species annotation                      | Enriched in | pvaluew | qvaluew | Rho   | pvaluesp | Status VD           |
|----------|---------------|-----------------------------------------|-------------|---------|---------|-------|----------|---------------------|
| msp_0172 | Firmicutes    | <i>Ruthenibacterium lactatiformans</i>  | ConD        | 0,00016 | 0,019   | -0,44 | 0,0004   | baseline, 4w and 8w |
| msp_0066 | Firmicutes    | <i>Clostridium</i> sp. AT4              | ConD        | 0,00481 | 0,10    | -0,35 | 0,0058   | baseline, 4w and 8w |
| msp_0024 | Firmicutes    | <i>Hungatella hathewayi</i> 2           | ConD        | 0,00559 | 0,10    | -0,34 | 0,0066   | 4w                  |
| msp_0249 | Firmicutes    | <i>unclassified Firmicutes</i>          | ConD        | 0,00665 | 0,10    | -0,23 | 0,0695   | 4w                  |
| msp_0335 | Bacteroidetes | <i>unclassified Alistipes</i>           | ConD        | 0,00681 | 0,10    | -0,38 | 0,0026   | baseline, 4w and 8w |
| msp_0619 | NA            | NA                                      | ConD        | 0,00895 | 0,12    | -0,31 | 0,0155   | 4w                  |
| msp_0058 | Firmicutes    | <i>Ruminococcus gnavus</i>              | ConD        | 0,00939 | 0,12    | -0,23 | 0,0734   | 4w and 8w           |
| msp_0707 | Firmicutes    | <i>unclassified Firmicutes</i>          | ConD        | 0,01057 | 0,12    | -0,24 | 0,0614   | 4w and 8w           |
| msp_0713 | Firmicutes    | <i>Clostridium citroniae</i>            | ConD        | 0,01088 | 0,12    | -0,43 | 0,0005   | baseline and 4w     |
| msp_0056 | Firmicutes    | <i>unclassified Clostridiales</i>       | ConD        | 0,01270 | 0,13    | -0,42 | 0,0008   | baseline, 4w and 8w |
| msp_0052 | Firmicutes    | <i>Blautia</i> sp. CAG:257              | ConD        | 0,01368 | 0,13    | -0,28 | 0,0296   | 4w and 8w           |
| msp_0317 | Firmicutes    | <i>unclassified Clostridiales</i>       | ConD        | 0,01368 | 0,13    | -0,13 | 0,3082   | 4w                  |
| msp_0331 | Firmicutes    | <i>Oscillibacter</i> sp.                | ConD        | 0,01379 | 0,13    | -0,33 | 0,0085   | 4w                  |
| msp_0271 | Firmicutes    | <i>Eubacterium</i> sp. CAG:180          | ConD        | 0,01420 | 0,13    | -0,28 | 0,0299   | 4w                  |
| msp_0126 | Firmicutes    | <i>Ruminococcus torques</i>             | ConD        | 0,01453 | 0,13    | -0,34 | 0,0063   | 4w and 8w           |
| msp_0621 | Firmicutes    | <i>Intestinibacter bartlettii</i>       | ConD        | 0,01563 | 0,13    | -0,14 | 0,2883   | 4w                  |
| msp_0027 | Bacteroidetes | <i>Parabacteroides merdae</i>           | ConD        | 0,01625 | 0,13    | -0,17 | 0,1937   | 4w                  |
| msp_1090 | NA            | NA                                      | ConD        | 0,01640 | 0,13    | -0,25 | 0,0528   | 4w                  |
| msp_0132 | Firmicutes    | <i>Coprobacillus cateniformis</i>       | ConD        | 0,01734 | 0,14    | -0,26 | 0,0425   | 4w and 8w           |
| msp_0318 | Bacteroidetes | <i>Alistipes indistinctus</i>           | ConD        | 0,01862 | 0,14    | -0,23 | 0,0765   | baseline and 4w     |
| msp_0014 | Firmicutes    | <i>Eisenbergiella tayi</i>              | ConD        | 0,01883 | 0,14    | -0,32 | 0,0115   | baseline, 4w and 8w |
| msp_0510 | Firmicutes    | <i>Clostridium glycyrrhizinilyticum</i> | ConD        | 0,02199 | 0,16    | -0,35 | 0,0056   | 4w                  |
| msp_1315 | Firmicutes    | <i>unclassified Firmicutes</i>          | ConD        | 0,02687 | 0,17    | -0,21 | 0,0981   | 4w                  |
| msp_0364 | Firmicutes    | <i>Intestinimonas butyriciproducens</i> | ConD        | 0,02694 | 0,17    | -0,23 | 0,0675   | 4w                  |
| msp_0442 | Firmicutes    | <i>unclassified Flavonifractor</i>      | ConD        | 0,02787 | 0,17    | -0,33 | 0,0089   | 4w                  |
| msp_0861 | Firmicutes    | <i>unclassified Oscillibacter</i>       | ConD        | 0,03166 | 0,19    | -0,30 | 0,0164   | 4w                  |
| msp_0230 | Bacteroidetes | <i>Alistipes inops</i>                  | ConD        | 0,03206 | 0,19    | -0,18 | 0,1559   | 4w                  |
| msp_1012 | Firmicutes    | <i>Intestinimonas massiliensis</i>      | ConD        | 0,03310 | 0,19    | -0,32 | 0,0109   | 4w                  |
| msp_0833 | Firmicutes    | <i>Streptococcus thermophilus</i>       | ConD        | 0,03320 | 0,19    | -0,30 | 0,0166   | 4w                  |

|           |                |                                                      |      |         |       |       |         |                     |
|-----------|----------------|------------------------------------------------------|------|---------|-------|-------|---------|---------------------|
| msp_0522  | Firmicutes     | <i>Anaerotruncus colihominis</i>                     | ConD | 0,03393 | 0,19  | -0,40 | 0,0012  | 4w                  |
| msp_0103  | Firmicutes     | <i>Clostridium innocuum</i>                          | ConD | 0,03433 | 0,19  | -0,30 | 0,0190  | 4w and 8w           |
| msp_0020  | Firmicutes     | <i>Clostridium clostridioforme</i> 1                 | ConD | 0,03648 | 0,20  | -0,33 | 0,0080  | baseline and 4w     |
| msp_0353  | NA             | NA                                                   | ConD | 0,04238 | 0,20  | -0,31 | 0,0157  | 4w                  |
| msp_1541  | Firmicutes     | <i>unclassified Clostridiales</i>                    | ConD | 0,04247 | 0,20  | -0,34 | 0,0074  | baseline and 4w     |
| msp_1724  | Firmicutes     | <i>Phoceea massiliensis</i>                          | ConD | 0,04435 | 0,21  | -0,27 | 0,0327  | 4w and 8w           |
| msp_0213  | Firmicutes     | <i>Flavonifractor plautii</i>                        | ConD | 0,04472 | 0,21  | -0,23 | 0,0679  | 4w and 8w           |
| msp_0881  | Proteobacteria | <i>Haemophilus parainfluenzae</i>                    | MedD | 0,00001 | 0,003 | 0,55  | 4,0E-06 | 4w and 8w           |
| msp_0388  | Firmicutes     | <i>Faecalibacterium prausnitzii</i> 3 (L2-6)         | MedD | 0,00010 | 0,017 | 0,24  | 0,0614  | 4w and 8w           |
| msp_0884  | Firmicutes     | <i>Veillonella atypica</i>                           | MedD | 0,00023 | 0,02  | 0,32  | 0,0104  | 4w                  |
| msp_1641  | Firmicutes     | <i>unclassified Lachnospiraceae</i>                  | MedD | 0,00037 | 0,03  | 0,35  | 0,0049  | 4w and 8w           |
| msp_1643c | Firmicutes     | <i>Ruminococcus</i> sp. JC304                        | MedD | 0,00052 | 0,03  | 0,28  | 0,0277  | baseline, 4w and 8w |
| msp_0979  | NA             | NA                                                   | MedD | 0,00156 | 0,08  | 0,37  | 0,0030  | baseline, 4w and 8w |
| msp_0906  | Firmicutes     | <i>Clostridium</i> sp.                               | MedD | 0,00188 | 0,08  | 0,40  | 0,0013  | baseline, 4w and 8w |
| msp_0285  | Firmicutes     | <i>Clostridium</i> sp. CAG:217                       | MedD | 0,00207 | 0,08  | 0,10  | 0,4188  | baseline, 4w and 8w |
| msp_0164  | Firmicutes     | <i>Ruminococcus</i> sp.                              | MedD | 0,00238 | 0,08  | 0,34  | 0,0077  | baseline, 4w and 8w |
| msp_0313  | Firmicutes     | <i>Veillonella parvula</i>                           | MedD | 0,00264 | 0,08  | 0,35  | 0,0060  | 4w and 8w           |
| msp_0930  | Firmicutes     | <i>unclassified Lachnospiraceae</i>                  | MedD | 0,00294 | 0,08  | 0,34  | 0,0066  | 4w                  |
| msp_1219  | Firmicutes     | <i>Veillonella rogosae</i>                           | MedD | 0,00302 | 0,08  | 0,32  | 0,0115  | 4w and 8w           |
| msp_0189  | Firmicutes     | <i>Blautia</i> sp. CAG:237                           | MedD | 0,00366 | 0,09  | 0,29  | 0,0245  | baseline, 4w and 8w |
| msp_0265  | Firmicutes     | <i>unclassified Faecalibacterium</i>                 | MedD | 0,00373 | 0,09  | 0,20  | 0,1173  | baseline, 4w and 8w |
| msp_0148c | Firmicutes     | <i>Veillonella dispar</i>                            | MedD | 0,00581 | 0,10  | 0,31  | 0,0128  | 4w                  |
| msp_0457  | Firmicutes     | <i>Faecalibacterium</i> sp. CAG:82                   | MedD | 0,00581 | 0,10  | 0,30  | 0,0193  | 4w and 8w           |
| msp_0296  | Firmicutes     | <i>unclassified Lachnospiraceae</i>                  | MedD | 0,00665 | 0,10  | 0,32  | 0,0112  | 4w and 8w           |
| msp_0898  | Firmicutes     | <i>unclassified butyrate-producing Clostridiales</i> | MedD | 0,00670 | 0,10  | 0,27  | 0,0315  | 4w                  |
| msp_0468  | Firmicutes     | <i>unclassified Clostridiales</i>                    | MedD | 0,00788 | 0,11  | 0,18  | 0,1566  | 4w                  |
| msp_0029  | Firmicutes     | <i>Eubacterium eligens</i>                           | MedD | 0,00928 | 0,12  | 0,27  | 0,0317  | 4w and 8w           |
| msp_0639  | Firmicutes     | <i>Faecalibacterium prausnitzii</i> 6                | MedD | 0,00944 | 0,12  | 0,39  | 0,0015  | baseline, 4w and 8w |
| msp_1236  | Firmicutes     | <i>unclassified Lachnoclostridium</i>                | MedD | 0,01079 | 0,12  | 0,37  | 0,0027  | 4w                  |
| msp_0301  | Firmicutes     | <i>Faecalibacterium prausnitzii</i> 1 (A2-165)       | MedD | 0,01144 | 0,12  | 0,38  | 0,0022  | 4w                  |
| msp_0075  | Firmicutes     | <i>Clostridium</i> sp.                               | MedD | 0,01145 | 0,12  | 0,28  | 0,0300  | 4w and 8w           |
| msp_0820  | Firmicutes     | <i>unclassified Clostridiales</i>                    | MedD | 0,01424 | 0,13  | 0,37  | 0,0031  | baseline, 4w and 8w |

|           |                |                                           |      |         |      |       |        |                     |
|-----------|----------------|-------------------------------------------|------|---------|------|-------|--------|---------------------|
| msp_0473c | Firmicutes     | <i>Clostridium sp.</i>                    | MedD | 0,02327 | 0,17 | 0,16  | 0,2225 | 4w and 8w           |
| msp_0297  | Firmicutes     | <i>unclassified Ruminococcaceae</i>       | MedD | 0,02327 | 0,17 | -0,31 | 0,0136 | 4w                  |
| msp_0679  | Firmicutes     | <i>unclassified Firmicutes</i>            | MedD | 0,02439 | 0,17 | 0,25  | 0,0525 | baseline, 4w and 8w |
| msp_0572  | Firmicutes     | <i>Lachnospira sp.</i>                    | MedD | 0,02460 | 0,17 | 0,33  | 0,0091 | 4w                  |
| msp_0015  | Firmicutes     | <i>Roseburia faecis</i>                   | MedD | 0,02557 | 0,17 | 0,22  | 0,0888 | 4w                  |
| msp_0068  | Firmicutes     | <i>Eubacterium rectale</i>                | MedD | 0,02557 | 0,17 | 0,24  | 0,0658 | 4w                  |
| msp_0017  | Firmicutes     | <i>Roseburia intestinalis</i>             | MedD | 0,02610 | 0,17 | 0,31  | 0,0150 | 4w and 8w           |
| msp_0563  | Firmicutes     | <i>unclassified Clostridium</i>           | MedD | 0,03159 | 0,19 | 0,34  | 0,0077 | 4w                  |
| msp_0125  | Firmicutes     | <i>unclassified Clostridiales</i>         | MedD | 0,03709 | 0,20 | 0,27  | 0,0373 | 4w                  |
| msp_1302  | Firmicutes     | <i>unclassified Firmicutes</i>            | MedD | 0,03912 | 0,20 | 0,24  | 0,0562 | 4w                  |
| msp_0986  | Firmicutes     | <i>Coprococcus catus</i>                  | MedD | 0,03927 | 0,20 | 0,31  | 0,0137 | 4w                  |
| msp_0086  | Firmicutes     | <i>Clostridium symbiosum</i>              | MedD | 0,03984 | 0,20 | -0,41 | 0,0009 | 4w                  |
| msp_1143  | Firmicutes     | <i>unclassified Oscillibacter</i>         | MedD | 0,04124 | 0,20 | 0,23  | 0,0680 | 4w                  |
| msp_1339  | Actinobacteria | <i>Gordonibacter urolithinifaciens</i>    | MedD | 0,04209 | 0,20 | 0,16  | 0,2228 | 4w                  |
| msp_0227  | Firmicutes     | <i>Eubacterium sp. 36_13 &amp; CAG:86</i> | MedD | 0,04285 | 0,20 | 0,37  | 0,0029 | 4w                  |
| msp_0133  | Firmicutes     | <i>Coprococcus sp.</i>                    | MedD | 0,04861 | 0,22 | 0,28  | 0,0276 | baseline and 4w     |

Total Number MSP species at 4w = 1051

| 8w        |                |                                               |             |         |         |       |          |                     |
|-----------|----------------|-----------------------------------------------|-------------|---------|---------|-------|----------|---------------------|
| MSP       | Phylum         | Species annotation                            | Enriched in | pvaluew | qvaluew | Rho   | pvaluesp | Status VD           |
| msp_0172  | Firmicutes     | <i>Ruthenibacterium lactatiformans</i>        | ConD        | 0,002   | 0,12    | -0,27 | 0,033    | baseline, 4w and 8w |
| msp_0126  | Firmicutes     | <i>Ruminococcus torques</i>                   | ConD        | 0,002   | 0,12    | -0,33 | 0,009    | 4w and 8w           |
| msp_0213  | Firmicutes     | <i>Flavonifractor plautii</i>                 | ConD        | 0,006   | 0,14    | -0,28 | 0,026    | 4w and 8w           |
| msp_0058  | Firmicutes     | <i>Ruminococcus gnavus</i>                    | ConD        | 0,007   | 0,14    | -0,21 | 0,094    | 4w and 8w           |
| msp_0132  | Firmicutes     | <i>Coprobacillus cateniformis</i>             | ConD        | 0,007   | 0,14    | -0,22 | 0,082    | 4w and 8w           |
| msp_0335  | Bacteroidetes  | <i>unclassified Alistipes</i>                 | ConD        | 0,007   | 0,14    | -0,37 | 0,003    | baseline, 4w and 8w |
| msp_0340  | Firmicutes     | <i>Clostridium leptum</i>                     | ConD        | 0,011   | 0,17    | -0,20 | 0,110    | 8w                  |
| msp_0263  | Actinobacteria | <i>Bifidobacterium adolescentis</i>           | ConD        | 0,012   | 0,17    | -0,28 | 0,029    | baseline and 8w     |
| msp_0014  | Firmicutes     | <i>Eisenbergiella tayi</i>                    | ConD        | 0,012   | 0,17    | -0,27 | 0,034    | baseline, 4w and 8w |
| msp_0112  | Firmicutes     | <i>Blautia hydrogenotrophica</i>              | ConD        | 0,014   | 0,18    | -0,27 | 0,037    | 8w                  |
| msp_0052  | Firmicutes     | <i>Blautia</i> sp. CAG:257                    | ConD        | 0,016   | 0,19    | -0,34 | 0,007    | 4w and 8w           |
| msp_0066  | Firmicutes     | <i>Clostridium</i> sp. AT4                    | ConD        | 0,025   | 0,27    | -0,28 | 0,027    | baseline, 4w and 8w |
| msp_1724  | Firmicutes     | <i>Phocea massiliensis</i>                    | ConD        | 0,027   | 0,27    | -0,33 | 0,009    | 4w and 8w           |
| msp_0005  | Proteobacteria | <i>Escherichia coli</i>                       | ConD        | 0,028   | 0,27    | -0,24 | 0,058    | 8w                  |
| msp_0259  | Firmicutes     | <i>Coprococcus comes</i>                      | ConD        | 0,028   | 0,27    | -0,20 | 0,111    | 8w                  |
| msp_0056  | Firmicutes     | <i>unclassified Clostridiales</i>             | ConD        | 0,035   | 0,32    | -0,23 | 0,070    | baseline, 4w and 8w |
| msp_0103  | Firmicutes     | <i>Clostridium innocuum</i>                   | ConD        | 0,036   | 0,32    | -0,22 | 0,090    | 4w and 8w           |
| msp_0707  | Firmicutes     | <i>unclassified Firmicutes</i>                | ConD        | 0,040   | 0,34    | -0,02 | 0,879    | 4w and 8w           |
| msp_1244  | Actinobacteria | <i>Collinsella aerofaciens</i>                | ConD        | 0,040   | 0,34    | -0,19 | 0,138    | 8w                  |
| msp_0881  | Proteobacteria | <i>Haemophilus parainfluenzae</i>             | MedD        | 0,000   | 0,05    | 0,40  | 0,001    | 4w and 8w           |
| msp_0906  | Firmicutes     | <i>Clostridium</i> sp.                        | MedD        | 0,000   | 0,07    | 0,36  | 0,004    | baseline, 4w and 8w |
| msp_0457  | Firmicutes     | <i>Faecalibacterium</i> sp. CAG:82            | MedD        | 0,002   | 0,12    | 0,33  | 0,008    | 4w and 8w           |
| msp_0820  | Firmicutes     | <i>unclassified Clostridiales</i>             | MedD        | 0,003   | 0,12    | 0,25  | 0,049    | baseline, 4w and 8w |
| msp_0388  | Firmicutes     | <i>Faecalibacterium prausnitzii</i> 3 ( L2-6) | MedD        | 0,003   | 0,12    | 0,24  | 0,056    | 4w and 8w           |
| msp_1643c | Firmicutes     | <i>Ruminococcus</i> sp. JC304                 | MedD        | 0,003   | 0,12    | 0,30  | 0,017    | baseline, 4w and 8w |
| msp_0979  | NA             | NA                                            | MedD        | 0,003   | 0,13    | 0,38  | 0,002    | baseline, 4w and 8w |
| msp_0164  | Firmicutes     | <i>Ruminococcus</i> sp.                       | MedD        | 0,004   | 0,13    | 0,23  | 0,074    | baseline, 4w and 8w |
| msp_0265  | Firmicutes     | <i>unclassified Faecalibacterium</i>          | MedD        | 0,005   | 0,13    | 0,17  | 0,176    | baseline, 4w and 8w |
| msp_0029  | Firmicutes     | <i>Eubacterium eligens</i>                    | MedD        | 0,005   | 0,13    | 0,37  | 0,003    | 4w and 8w           |

|           |                |                                         |      |       |      |      |       |                     |
|-----------|----------------|-----------------------------------------|------|-------|------|------|-------|---------------------|
| msp_0075  | Firmicutes     | <i>Clostridium</i> sp.                  | MedD | 0,006 | 0,14 | 0,27 | 0,031 | 4w and 8w           |
| msp_0473c | Firmicutes     | <i>Clostridium</i> sp.                  | MedD | 0,007 | 0,14 | 0,27 | 0,034 | 4w and 8w           |
| msp_1641  | Firmicutes     | <i>unclassified Lachnospiraceae</i>     | MedD | 0,008 | 0,15 | 0,38 | 0,002 | 4w and 8w           |
| msp_0285  | Firmicutes     | <i>Clostridium</i> sp. CAG:217          | MedD | 0,011 | 0,17 | 0,05 | 0,717 | baseline, 4w and 8w |
| msp_0296  | Firmicutes     | <i>unclassified Lachnospiraceae</i>     | MedD | 0,012 | 0,17 | 0,26 | 0,040 | 4w and 8w           |
| msp_1219  | Firmicutes     | <i>Veillonella rogosae</i>              | MedD | 0,012 | 0,17 | 0,20 | 0,121 | 4w and 8w           |
| msp_0071  | Firmicutes     | <i>Roseburia hominis</i>                | MedD | 0,012 | 0,17 | 0,18 | 0,173 | 8w                  |
| msp_0017  | Firmicutes     | <i>Roseburia intestinalis</i>           | MedD | 0,014 | 0,18 | 0,24 | 0,065 | 4w and 8w           |
| msp_0679  | Firmicutes     | <i>unclassified Firmicutes</i>          | MedD | 0,016 | 0,19 | 0,26 | 0,041 | baseline, 4w and 8w |
| msp_0639  | Firmicutes     | <i>Faecalibacterium prausnitzii</i> 6   | MedD | 0,020 | 0,22 | 0,28 | 0,027 | baseline, 4w and 8w |
| msp_0189  | Firmicutes     | <i>Blautia</i> sp. CAG:237              | MedD | 0,025 | 0,27 | 0,27 | 0,036 | baseline, 4w and 8w |
| msp_0313  | Firmicutes     | <i>Veillonella parvula</i>              | MedD | 0,031 | 0,29 | 0,21 | 0,099 | 4w and 8w           |
| msp_0860  | Firmicutes     | <i>unclassified Intestinibacter</i>     | MedD | 0,042 | 0,35 | 0,25 | 0,052 | 8w                  |
| msp_0145  | Proteobacteria | <i>Parasutterella excrementihominis</i> | MedD | 0,044 | 0,36 | 0,01 | 0,927 | 8w                  |
| msp_0780  | Firmicutes     | <i>unclassified Lachnospiraceae</i>     | MedD | 0,047 | 0,38 | 0,22 | 0,081 | 8w                  |

Total Number MSP species at 8w = 1037
