# Supplementary material for: Mediterranean diet intervention in overweight and obese subjects lowers plasma cholesterol and causes changes in the gut microbiome and metabolome independently of energy intake
Source: HighWire-hosted journal article supplement (doi:10.1136/gutjnl-2019-320438), 2020-02-19
Supplement: gutjnl-2019-320438supp008_data_supplement.pdf [file gutjnl-2019-320438supp008_data_supplement.pdf]

**Supplementary Table 6** List of contrasted MSP within diets. List of contrasted MSP within ConD and MedD groups for the 4w-baseline and 8w-4w periods (after 20% occurrence filter) with their enrichment status and pvalues from paired Wilcoxon rank sum tests (pvaluew) and after adjustment for multiple comparisons using the Benjamini-Hochberg procedure (qvaluew).

| ConD_baseline vs 4w |               |                                       |         |         |             |
|---------------------|---------------|---------------------------------------|---------|---------|-------------|
| MSP                 | phylum        | species                               | pvaluew | qvaluew | Enriched at |
| msp_1349            | Firmicutes    | <i>unclassified Ruminococcaceae</i>   | 0,0046  | 0,79    | baseline    |
| msp_0215            | Firmicutes    | <i>Dialister</i> sp. CAG:357          | 0,0068  | 0,79    | baseline    |
| msp_1302            | Firmicutes    | <i>unclassified Firmicutes</i>        | 0,0113  | 0,80    | baseline    |
| msp_0554            | Firmicutes    | <i>Anaerostipes hadrus</i> 2          | 0,0147  | 0,86    | baseline    |
| msp_0324            | Firmicutes    | <i>Faecalibacterium prausnitzii</i> 7 | 0,0238  | 1,00    | baseline    |
| msp_0335            | Bacteroidetes | <i>unclassified Alistipes</i>         | 0,0263  | 1,00    | baseline    |
| msp_1556            | Firmicutes    | <i>Holdemania filiformis</i>          | 0,0274  | 1,00    | baseline    |
| msp_1403            | Firmicutes    | <i>Blautia</i> sp.                    | 0,0333  | 1,00    | baseline    |
| msp_0129            | Firmicutes    | <i>Clostridium</i> sp. CAG:58         | 0,0383  | 1,00    | baseline    |
| msp_0221            | Firmicutes    | <i>Acidaminococcus intestini</i>      | 0,0465  | 1,00    | baseline    |
| msp_0331            | Firmicutes    | <i>Oscillibacter</i> sp.              | 0,0475  | 1,00    | baseline    |
| msp_0440            | Firmicutes    | <i>unclassified Eubacterium</i>       | 0,0042  | 0,79    | 4w          |
| msp_0893            | Firmicutes    | <i>Faecalibacterium prausnitzii</i> 2 | 0,0114  | 0,80    | 4w          |
| msp_0035            | Bacteroidetes | <i>Bacteroides dorei</i>              | 0,0349  | 1,00    | 4w          |

Total Number MSP species ConD baseline vs 4w = 975

## ConD\_4w vs 8w

| MSP      | phylum         | species                                | pvaluew | qvaluew | Enriched at |
|----------|----------------|----------------------------------------|---------|---------|-------------|
| msp_1362 | Firmicutes     | <i>Holdemania massiliensis</i>         | 0,014   | 0,701   | 4w          |
| msp_0225 | Bacteroidetes  | <i>Alistipes obesi</i>                 | 0,015   | 0,701   | 4w          |
| msp_0432 | unclassified   | <i>unclassified</i>                    | 0,017   | 0,701   | 4w          |
| msp_0440 | Firmicutes     | <i>unclassified Eubacterium</i>        | 0,017   | 0,701   | 4w          |
| msp_0046 | Bacteroidetes  | <i>Bacteroides uniformis</i>           | 0,018   | 0,701   | 4w          |
| msp_0069 | Bacteroidetes  | <i>Bacteroides vulgatus</i>            | 0,034   | 0,793   | 4w          |
| msp_0906 | Firmicutes     | <i>Clostridium sp.</i>                 | 0,041   | 0,793   | 4w          |
| msp_0259 | Firmicutes     | <i>Coprococcus comes</i>               | 0,008   | 0,701   | 8w          |
| msp_1381 | Firmicutes     | <i>Butyricoccus sp.</i>                | 0,009   | 0,701   | 8w          |
| msp_1244 | Actinobacteria | <i>Collinsella aerofaciens</i>         | 0,009   | 0,701   | 8w          |
| msp_1349 | Firmicutes     | <i>unclassified Ruminococcaceae</i>    | 0,015   | 0,701   | 8w          |
| msp_1339 | Actinobacteria | <i>Gordonibacter urolithinifaciens</i> | 0,024   | 0,701   | 8w          |
| msp_0126 | Firmicutes     | <i>Ruminococcus torques</i>            | 0,025   | 0,701   | 8w          |
| msp_0215 | Firmicutes     | <i>Dialister sp. CAG:357</i>           | 0,025   | 0,701   | 8w          |
| msp_0467 | Firmicutes     | <i>Firmicutes bacterium CAG:94</i>     | 0,026   | 0,701   | 8w          |
| msp_0045 | Firmicutes     | <i>Ruminococcus bromii 2</i>           | 0,036   | 0,793   | 8w          |
| msp_0385 | Firmicutes     | <i>Ruminococcaceae bacterium D16</i>   | 0,041   | 0,793   | 8w          |
| msp_0419 | Actinobacteria | <i>Bifidobacterium bifidum</i>         | 0,042   | 0,793   | 8w          |
| msp_0874 | Firmicutes     | <i>unclassified Firmicutes</i>         | 0,045   | 0,793   | 8w          |

Total Number MSP species ConD 4w vs 8w = 960

## MedD\_baseline vs 4w

| MSP       | phylum        | species                                 | pvaluew | qvaluew | Enriched at |
|-----------|---------------|-----------------------------------------|---------|---------|-------------|
| msp_0213  | Firmicutes    | <i>Flavonifractor plautii</i>           | 0,0001  | 0,0240  | baseline    |
| msp_0331  | Firmicutes    | <i>Oscillibacter sp.</i>                | 0,001   | 0,0815  | baseline    |
| msp_0342  | Firmicutes    | <i>Flavonifractor sp.</i>               | 0,001   | 0,0859  | baseline    |
| msp_0613  | Firmicutes    | <i>unclassified Clostridiales</i>       | 0,003   | 0,1030  | baseline    |
| msp_0565  | Firmicutes    | <i>unclassified Ruminococcaceae</i>     | 0,003   | 0,1030  | baseline    |
| msp_0024  | Firmicutes    | <i>Hungatella hathewayi 2</i>           | 0,005   | 0,1560  | baseline    |
| msp_0172  | Firmicutes    | <i>Ruthenibacterium lactatiformans</i>  | 0,006   | 0,1560  | baseline    |
| msp_1060c | Firmicutes    | <i>unclassified Flavonifractor</i>      | 0,007   | 0,1560  | baseline    |
| msp_0781  | Firmicutes    | <i>unclassified Clostridiales</i>       | 0,008   | 0,1560  | baseline    |
| msp_0833  | Firmicutes    | <i>Streptococcus thermophilus</i>       | 0,009   | 0,1560  | baseline    |
| msp_0312  | Firmicutes    | <i>Firmicutes bacterium CAG:110</i>     | 0,012   | 0,1560  | baseline    |
| msp_0152  | Firmicutes    | <i>Ruminococcus faecis</i>              | 0,012   | 0,1560  | baseline    |
| msp_0467  | Firmicutes    | <i>Firmicutes bacterium CAG:94</i>      | 0,012   | 0,1560  | baseline    |
| msp_0500  | Firmicutes    | <i>unclassified Firmicutes</i>          | 0,012   | 0,1560  | baseline    |
| msp_0621  | Firmicutes    | <i>Intestinibacter bartlettii</i>       | 0,013   | 0,1560  | baseline    |
| msp_1349  | Firmicutes    | <i>unclassified Ruminococcaceae</i>     | 0,013   | 0,1560  | baseline    |
| msp_0364  | Firmicutes    | <i>Intestinimonas butyriciproducens</i> | 0,013   | 0,1560  | baseline    |
| msp_0357  | Firmicutes    | <i>Clostridium sp. CAG:169</i>          | 0,013   | 0,1560  | baseline    |
| msp_0121  | Firmicutes    | <i>unclassified Oscillibacter</i>       | 0,014   | 0,1560  | baseline    |
| msp_0335  | Bacteroidetes | <i>unclassified Alistipes</i>           | 0,014   | 0,1560  | baseline    |
| msp_1090  | unclassified  | <i>unclassified</i>                     | 0,014   | 0,1560  | baseline    |
| msp_0308  | Firmicutes    | <i>Clostridium saccharolyticum 2</i>    | 0,014   | 0,1560  | baseline    |
| msp_0510  | Firmicutes    | <i>Clostridium glycyrrhizinilyticum</i> | 0,017   | 0,1678  | baseline    |
| msp_0545  | Firmicutes    | <i>Pseudoflavonifractor sp. An184</i>   | 0,018   | 0,1678  | baseline    |
| msp_0314  | Firmicutes    | <i>unclassified Clostridiales</i>       | 0,019   | 0,1678  | baseline    |
| msp_0132  | Firmicutes    | <i>Coprobacillus cateniformis</i>       | 0,019   | 0,1678  | baseline    |
| msp_0462  | Firmicutes    | <i>unclassified Clostridiales</i>       | 0,020   | 0,1678  | baseline    |
| msp_0126  | Firmicutes    | <i>Ruminococcus torques</i>             | 0,020   | 0,1678  | baseline    |
| msp_0777  | Firmicutes    | <i>Firmicutes bacterium CAG:129</i>     | 0,021   | 0,1678  | baseline    |
| msp_0040  | Bacteroidetes | <i>Bacteroides massiliensis</i>         | 0,022   | 0,1690  | baseline    |
| msp_0249  | Firmicutes    | <i>unclassified Firmicutes</i>          | 0,023   | 0,1717  | baseline    |
| msp_0592  | Firmicutes    | <i>unclassified Clostridiales</i>       | 0,024   | 0,1732  | baseline    |
| msp_0861  | Firmicutes    | <i>unclassified Oscillibacter</i>       | 0,025   | 0,1758  | baseline    |
| msp_1013  | Firmicutes    | <i>unclassified Firmicutes</i>          | 0,025   | 0,1771  | baseline    |
| msp_0027  | Bacteroidetes | <i>Parabacteroides merdae</i>           | 0,027   | 0,1835  | baseline    |
| msp_0435  | Firmicutes    | <i>unclassified Oscillibacter</i>       | 0,029   | 0,1864  | baseline    |
| msp_1315  | Firmicutes    | <i>unclassified Firmicutes</i>          | 0,037   | 0,2189  | baseline    |
| msp_0205  | Firmicutes    | <i>Firmicutes bacterium CAG:124</i>     | 0,037   | 0,2189  | baseline    |
| msp_0317  | Firmicutes    | <i>unclassified Clostridiales</i>       | 0,038   | 0,2189  | baseline    |
| msp_1356  | Firmicutes    | <i>Anaeromassilibacillus sp. An250</i>  | 0,041   | 0,2291  | baseline    |
| msp_0144  | Firmicutes    | <i>Clostridium sp. CAG:138</i>          | 0,041   | 0,2291  | baseline    |
| msp_0471  | Firmicutes    | <i>unclassified Clostridiales</i>       | 0,044   | 0,2291  | baseline    |
| msp_0287  | Bacteroidetes | <i>Alistipes ihumii</i>                 | 0,044   | 0,2291  | baseline    |
| msp_1724  | Firmicutes    | <i>Phoceia massiliensis</i>             | 0,044   | 0,2291  | baseline    |

|           |                |                                               |         |         |          |
|-----------|----------------|-----------------------------------------------|---------|---------|----------|
| msp_0046  | Bacteroidetes  | <i>Bacteroides uniformis</i>                  | 0,047   | 0,2426  | baseline |
| msp_0388  | Firmicutes     | <i>Faecalibacterium prausnitzii</i> 3 ( L2-6) | 4,7E-08 | 0,00002 | 4w       |
| msp_0906  | Firmicutes     | <i>Clostridium</i> sp.                        | 0,001   | 0,0815  | 4w       |
| msp_0756  | Firmicutes     | <i>unclassified Blautia</i>                   | 0,002   | 0,0987  | 4w       |
| msp_0296  | Firmicutes     | <i>unclassified Lachnospiraceae</i>           | 0,003   | 0,1030  | 4w       |
| msp_0473c | Firmicutes     | <i>Clostridium</i> sp.                        | 0,007   | 0,1560  | 4w       |
| msp_0015  | Firmicutes     | <i>Roseburia faecis</i>                       | 0,008   | 0,1560  | 4w       |
| msp_0881  | Proteobacteria | <i>Haemophilus parainfluenzae</i>             | 0,008   | 0,1560  | 4w       |
| msp_0047  | Firmicutes     | <i>Eubacterium</i> sp. CAG:115                | 0,008   | 0,1560  | 4w       |
| msp_0572  | Firmicutes     | <i>Lachnospira</i> sp.                        | 0,011   | 0,1560  | 4w       |
| msp_1219  | Firmicutes     | <i>Veillonella rogosae</i>                    | 0,012   | 0,1560  | 4w       |
| msp_0071  | Firmicutes     | <i>Roseburia hominis</i>                      | 0,015   | 0,1560  | 4w       |
| msp_0075  | Firmicutes     | <i>Clostridium</i> sp.                        | 0,017   | 0,1678  | 4w       |
| msp_0772  | Firmicutes     | <i>Clostridiales</i> sp.                      | 0,019   | 0,1678  | 4w       |
| msp_0820  | Firmicutes     | <i>unclassified Clostridiales</i>             | 0,021   | 0,1678  | 4w       |
| msp_0903  | Firmicutes     | <i>Oscillibacter</i> sp. 57_20                | 0,022   | 0,1690  | 4w       |
| msp_1062  | Firmicutes     | <i>unclassified Oscillibacter</i>             | 0,022   | 0,1707  | 4w       |
| msp_0654  | Firmicutes     | <i>Firmicutes bacterium</i> CAG:103           | 0,028   | 0,1864  | 4w       |
| msp_1236  | Firmicutes     | <i>unclassified Lachnoclostridium</i>         | 0,029   | 0,1864  | 4w       |
| msp_1533  | Firmicutes     | <i>unclassified Clostridiales</i>             | 0,029   | 0,1864  | 4w       |
| msp_0175  | Firmicutes     | <i>unclassified Lachnospiraceae</i>           | 0,030   | 0,1887  | 4w       |
| msp_0930  | Firmicutes     | <i>unclassified Lachnospiraceae</i>           | 0,036   | 0,2176  | 4w       |
| msp_0139  | Bacteroidetes  | <i>Coprobacter fastidiosus</i>                | 0,041   | 0,2291  | 4w       |
| msp_1492  | Firmicutes     | <i>unclassified Lachnospiraceae</i>           | 0,043   | 0,2291  | 4w       |
| msp_0107  | Firmicutes     | <i>Anaerostipes hadrus</i> 1                  | 0,049   | 0,2456  | 4w       |

Total Number MSP species MedD baseline vs 4w = 928

## MedD\_4w vs 8w

| MSP      | phylum         | species                                      | pvaluew | qvaluew | Enriched at |
|----------|----------------|----------------------------------------------|---------|---------|-------------|
| msp_0065 | Firmicutes     | <i>Blautia sp.</i>                           | 0,0054  | 0,9540  | 4w          |
| msp_0530 | Firmicutes     | <i>Dorea longicatena 2</i>                   | 0,0111  | 0,9540  | 4w          |
| msp_0930 | Firmicutes     | <i>unclassified Lachnospiraceae</i>          | 0,0129  | 0,9540  | 4w          |
| msp_1622 | Firmicutes     | <i>Clostridium sp.</i>                       | 0,0175  | 0,9540  | 4w          |
| msp_0188 | Firmicutes     | <i>Coprobacillus sp.</i>                     | 0,0179  | 0,9540  | 4w          |
| msp_0005 | Proteobacteria | <i>Escherichia coli</i>                      | 0,0249  | 0,9540  | 4w          |
| msp_0388 | Firmicutes     | <i>Faecalibacterium prausnitzii 3 (L2-6)</i> | 0,0262  | 0,9540  | 4w          |
| msp_0906 | Firmicutes     | <i>Clostridium sp.</i>                       | 0,0314  | 0,9540  | 4w          |
| msp_0018 | Firmicutes     | <i>Clostridium sp.</i>                       | 0,0328  | 0,9540  | 4w          |
| msp_0107 | Firmicutes     | <i>Anaerostipes hadrus 1</i>                 | 0,0345  | 0,9540  | 4w          |
| msp_0356 | Firmicutes     | <i>unclassified Clostridiales</i>            | 0,0352  | 0,9540  | 4w          |
| msp_0572 | Firmicutes     | <i>Lachnospira sp.</i>                       | 0,0355  | 0,9540  | 4w          |
| msp_0340 | Firmicutes     | <i>Clostridium leptum</i>                    | 0,0415  | 0,9580  | 4w          |
| msp_0467 | Firmicutes     | <i>Firmicutes bacterium CAG:94</i>           | 0,0464  | 0,9580  | 4w          |
| msp_0898 | Firmicutes     | <i>Clostridium sp.</i>                       | 0,0467  | 0,9580  | 4w          |
| msp_0342 | Firmicutes     | <i>Flavonifractor sp.</i>                    | 0,0234  | 0,9540  | 8w          |
| msp_0031 | Bacteroidetes  | <i>Bacteroides stercoris</i>                 | 0,0422  | 0,9580  | 8w          |

Total Number MSP species MedD 4w vs 8w = 913
