# Supplementary material for: Mediterranean diet intervention in overweight and obese subjects lowers plasma cholesterol and causes changes in the gut microbiome and metabolome independently of energy intake
Source: HighWire-hosted journal article supplement (doi:10.1136/gutjnl-2019-320438), 2020-02-19
Supplement: gutjnl-2019-320438supp010_data_supplement.pdf [file gutjnl-2019-320438supp010_data_supplement.pdf]

**Supplementary Table 8** Spearman's correlations between targeted urinary urolithins and microbiota.

|                                                                            | Urolithin-A-glucuronide | Urolithin-B-glucuronide | Urolithin-C-glucuronide | Total Urolithins (A+B+C) | Family level              | Taxonomy                                                                                                                               |
|----------------------------------------------------------------------------|-------------------------|-------------------------|-------------------------|--------------------------|---------------------------|----------------------------------------------------------------------------------------------------------------------------------------|
| Bifidobacterium adolescentis_msp_0263                                      | <b>-0.18</b>            | -0.09                   | <b>-0.16</b>            | <b>-0.18</b>             | <i>Bifidobacteriaceae</i> | Actinobacteria; Actinobacteria; Bifidobacteriales; Bifidobacteriaceae; Bifidobacterium; Bifidobacterium adolescentis                   |
| Bifidobacterium bifidum_msp_0419                                           | -0.12                   | <b>-0.2</b>             | -0.08                   | -0.13                    | <i>Bifidobacteriaceae</i> | Actinobacteria; Actinobacteria; Bifidobacteriales; Bifidobacteriaceae; Bifidobacterium; Bifidobacterium bifidum                        |
| Collinsella aerofaciens_msp_1244                                           | <b>-0.15</b>            | -0.06                   | -0.04                   | <b>-0.18</b>             | <i>Coriobacteriaceae</i>  | Actinobacteria; Coriobacteriia; Coriobacteriales; Coriobacteriaceae; Collinsella; Collinsella aerofaciens                              |
| unclassified Adlercreutzia_msp_0396                                        | 0.09                    | 0.01                    | <b>0.16</b>             | 0.12                     | <i>Eggerthellaceae</i>    | Actinobacteria; Coriobacteriia; Eggerthellales; Eggerthellaceae; Adlercreutzia; unclassified Adlercreutzia                             |
| Eggerthella lenta_msp_0573                                                 | 0.03                    | <b>-0.15</b>            | 0.08                    | 0.03                     | <i>Eggerthellaceae</i>    | Actinobacteria; Coriobacteriia; Eggerthellales; Eggerthellaceae; Eggerthella; Eggerthella lenta                                        |
| Gordonibacter urolithinifaciens_msp_1339                                   | <b>0.19</b>             | -0.05                   | <b>0.18</b>             | <b>0.19</b>              | <i>Eggerthellaceae</i>    | Actinobacteria; Coriobacteriia; Eggerthellales; Eggerthellaceae; Gordonibacter; Gordonibacter urolithinifaciens                        |
| Bacteroides cellulosilyticus_msp_0003                                      | 0.12                    | 0.11                    | <b>0.15</b>             | <b>0.15</b>              | <i>Bacteroidaceae</i>     | Bacteroidetes; Bacteroidia; Bacteroidales; Bacteroidaceae; Bacteroides; Bacteroides cellulosilyticus                                   |
| Bacteroides dorei_msp_0035                                                 | 0.12                    | <b>0.23</b>             | 0.14                    | <b>0.19</b>              | <i>Bacteroidaceae</i>     | Bacteroidetes; Bacteroidia; Bacteroidales; Bacteroidaceae; Bacteroides; Bacteroides dorei                                              |
| Bacteroides faecis_msp_0019                                                | 0.09                    | -0.11                   | <b>0.15</b>             | 0.07                     | <i>Bacteroidaceae</i>     | Bacteroidetes; Bacteroidia; Bacteroidales; Bacteroidaceae; Bacteroides; Bacteroides faecis                                             |
| Bacteroides salyersiae_msp_0037                                            | <b>0.17</b>             | 0.11                    | 0.05                    | <b>0.17</b>              | <i>Bacteroidaceae</i>     | Bacteroidetes; Bacteroidia; Bacteroidales; Bacteroidaceae; Bacteroides; Bacteroides salyersiae                                         |
| Bacteroides sp. CAG:144_msp_0412                                           | <b>0.2</b>              | <b>0.26</b>             | <b>0.15</b>             | <b>0.24</b>              | <i>Bacteroidaceae</i>     | Bacteroidetes; Bacteroidia; Bacteroidales; Bacteroidaceae; Bacteroides; Bacteroides sp. CAG:144                                        |
| Coprobacter secundus == Gabonia massiliensis_msp_0198                      | <b>0.2</b>              | 0.13                    | 0.14                    | <b>0.2</b>               | <i>Barnesiellaceae</i>    | Bacteroidetes; Bacteroidia; Bacteroidales; Barnesiellaceae; Coprobacter; Coprobacter secundus == Gabonia massiliensis                  |
| Alistipes inops == Tidjanibacter massiliensis_msp_0230                     | 0.05                    | <b>-0.17</b>            | 0                       | -0.02                    | <i>Rikenellaceae</i>      | Bacteroidetes; Bacteroidia; Bacteroidales; Rikenellaceae; Alistipes; Alistipes inops == Tidjanibacter massiliensis                     |
| Alistipes obesi_msp_0225                                                   | 0.1                     | <b>0.23</b>             | 0.08                    | <b>0.16</b>              | <i>Rikenellaceae</i>      | Bacteroidetes; Bacteroidia; Bacteroidales; Rikenellaceae; Alistipes; Alistipes obesi                                                   |
| Alistipes senegalensis_msp_0381                                            | 0.11                    | <b>0.16</b>             | 0.02                    | 0.11                     | <i>Rikenellaceae</i>      | Bacteroidetes; Bacteroidia; Bacteroidales; Rikenellaceae; Alistipes; Alistipes senegalensis                                            |
| Parabacteroides goldsteinii_msp_0028                                       | <b>0.2</b>              | 0.06                    | 0.14                    | <b>0.17</b>              | <i>Tannerellaceae</i>     | Bacteroidetes; Bacteroidia; Bacteroidales; Tannerellaceae; Parabacteroides; Parabacteroides goldsteinii                                |
| Parabacteroides merdae_msp_0027                                            | -0.02                   | <b>-0.15</b>            | -0.05                   | -0.09                    | <i>Tannerellaceae</i>     | Bacteroidetes; Bacteroidia; Bacteroidales; Tannerellaceae; Parabacteroides; Parabacteroides merdae                                     |
| Streptococcus thermophilus_msp_0833                                        | <b>-0.16</b>            | -0.06                   | <b>-0.23</b>            | <b>-0.16</b>             | <i>Streptococcaceae</i>   | Firmicutes; Bacilli; Lactobacillales; Streptococcaceae; Streptococcus; Streptococcus thermophilus                                      |
| Butyricoccus sp. 2789STDY5834927 / Clostridia bacterium UC5.1-1D1_msp_1381 | -0.06                   | <b>-0.17</b>            | -0.03                   | -0.05                    | <i>Clostridiaceae</i>     | Firmicutes; Clostridia; Clostridiales; Clostridiaceae; Butyricoccus; Butyricoccus sp. 2789STDY5834927 / Clostridia bacterium UC5.1-1D1 |
| Clostridium saudense_msp_0362                                              | <b>-0.15</b>            | <b>-0.17</b>            | -0.07                   | <b>-0.17</b>             | <i>Clostridiaceae</i>     | Firmicutes; Clostridia; Clostridiales; Clostridiaceae; Clostridium; Clostridium saudense                                               |
| Clostridium sp. 2789STDY5608831_msp_1608c                                  | -0.11                   | <b>0.16</b>             | -0.03                   | -0.02                    | <i>Clostridiaceae</i>     | Firmicutes; Clostridia; Clostridiales; Clostridiaceae; Clostridium; Clostridium sp. 2789STDY5608831                                    |
| Clostridium sp. AT4_msp_0066                                               | -0.14                   | -0.14                   | <b>-0.14</b>            | <b>-0.17</b>             | <i>Clostridiaceae</i>     | Firmicutes; Clostridia; Clostridiales; Clostridiaceae; Clostridium; Clostridium sp. AT4                                                |
| unclassified Clostridium_msp_0563                                          | <b>0.19</b>             | -0.02                   | 0.12                    | 0.13                     | <i>Clostridiaceae</i>     | Firmicutes; Clostridia; Clostridiales; Clostridiaceae; Clostridium; unclassified Clostridium                                           |
| Eubacterium eligens_msp_0029                                               | <b>0.18</b>             | <b>0.2</b>              | <b>0.25</b>             | <b>0.26</b>              | <i>Eubacteriaceae</i>     | Firmicutes; Clostridia; Clostridiales; Eubacteriaceae; Eubacterium; Eubacterium eligens                                                |

|                                                                         |              |              |              |              |                        |                                                                                                                                 |
|-------------------------------------------------------------------------|--------------|--------------|--------------|--------------|------------------------|---------------------------------------------------------------------------------------------------------------------------------|
| Eubacterium sp. 36_13 & CAG:86_msp_0227                                 | <b>0.19</b>  | <b>0.14</b>  | <b>0.24</b>  | <b>0.24</b>  | <i>Eubacteriaceae</i>  | Firmicutes; Clostridia; Clostridiales; Eubacteriaceae; Eubacterium; Eubacterium sp. 36_13 & CAG:86                              |
| Eubacterium sp. CAG:115_msp_0047                                        | <b>0.21</b>  | 0.06         | <b>0.16</b>  | <b>0.22</b>  | <i>Eubacteriaceae</i>  | Firmicutes; Clostridia; Clostridiales; Eubacteriaceae; Eubacterium; Eubacterium sp. CAG:115                                     |
| Eubacterium sp. CAG:180_msp_0271                                        | <b>-0.19</b> | -0.05        | -0.13        | <b>-0.18</b> | <i>Eubacteriaceae</i>  | Firmicutes; Clostridia; Clostridiales; Eubacteriaceae; Eubacterium; Eubacterium sp. CAG:180                                     |
| Eubacterium sp. CAG:248_msp_0161                                        | -0.02        | -0.01        | <b>-0.15</b> | -0.05        | <i>Eubacteriaceae</i>  | Firmicutes; Clostridia; Clostridiales; Eubacteriaceae; Eubacterium; Eubacterium sp. CAG:248                                     |
| Blautia massiliensis_msp_0141                                           | <b>-0.18</b> | <b>-0.2</b>  | -0.13        | <b>-0.21</b> | <i>Lachnospiraceae</i> | Firmicutes; Clostridia; Clostridiales; Lachnospiraceae; Blautia; Blautia massiliensis                                           |
| Blautia obeum_msp_0436                                                  | 0.02         | <b>0.15</b>  | 0.04         | 0.06         | <i>Lachnospiraceae</i> | Firmicutes; Clostridia; Clostridiales; Lachnospiraceae; Blautia; Blautia obeum                                                  |
| Blautia sp. CAG:237_msp_0189                                            | <b>0.21</b>  | -0.03        | <b>0.19</b>  | <b>0.19</b>  | <i>Lachnospiraceae</i> | Firmicutes; Clostridia; Clostridiales; Lachnospiraceae; Blautia; Blautia sp. CAG:237                                            |
| Blautia sp. CAG:257_msp_0052                                            | <b>-0.19</b> | <b>-0.15</b> | <b>-0.15</b> | <b>-0.24</b> | <i>Lachnospiraceae</i> | Firmicutes; Clostridia; Clostridiales; Lachnospiraceae; Blautia; Blautia sp. CAG:257                                            |
| Blautia sp. Marseille-P3087 / Ruminococcus sp. 2789STDY5608882_msp_0722 | <b>-0.16</b> | -0.08        | -0.01        | <b>-0.14</b> | <i>Lachnospiraceae</i> | Firmicutes; Clostridia; Clostridiales; Lachnospiraceae; Blautia; Blautia sp. Marseille-P3087 / Ruminococcus sp. 2789STDY5608882 |
| Blautia wexlerae_msp_0076                                               | <b>-0.17</b> | <b>-0.25</b> | -0.1         | <b>-0.21</b> | <i>Lachnospiraceae</i> | Firmicutes; Clostridia; Clostridiales; Lachnospiraceae; Blautia; Blautia wexlerae                                               |
| Ruminococcus gnavus_msp_0058                                            | <b>-0.2</b>  | <b>-0.21</b> | <b>-0.24</b> | <b>-0.26</b> | <i>Lachnospiraceae</i> | Firmicutes; Clostridia; Clostridiales; Lachnospiraceae; Blautia; Ruminococcus gnavus                                            |
| Ruminococcus sp. CAG:60 / Blautia sp. 2789STDY5608836_msp_0244          | <b>0.23</b>  | 0.09         | <b>0.15</b>  | <b>0.19</b>  | <i>Lachnospiraceae</i> | Firmicutes; Clostridia; Clostridiales; Lachnospiraceae; Blautia; Ruminococcus sp. CAG:60 / Blautia sp. 2789STDY5608836          |
| Ruminococcus torques_msp_0126                                           | -0.13        | <b>-0.17</b> | <b>-0.15</b> | <b>-0.15</b> | <i>Lachnospiraceae</i> | Firmicutes; Clostridia; Clostridiales; Lachnospiraceae; Blautia; Ruminococcus torques                                           |
| unclassified Blautia_msp_0756                                           | 0.14         | <b>0.23</b>  | <b>0.15</b>  | <b>0.16</b>  | <i>Lachnospiraceae</i> | Firmicutes; Clostridia; Clostridiales; Lachnospiraceae; Blautia; unclassified Blautia                                           |
| unclassified Blautia_msp_1385                                           | 0            | <b>0.15</b>  | -0.04        | 0.04         | <i>Lachnospiraceae</i> | Firmicutes; Clostridia; Clostridiales; Lachnospiraceae; Blautia; unclassified Blautia                                           |
| Coprococcus catus_msp_0986                                              | -0.01        | 0.01         | <b>0.19</b>  | 0            | <i>Lachnospiraceae</i> | Firmicutes; Clostridia; Clostridiales; Lachnospiraceae; Coprococcus; Coprococcus catus                                          |
| Coprococcus comes_msp_0259                                              | <b>-0.2</b>  | -0.03        | -0.12        | <b>-0.15</b> | <i>Lachnospiraceae</i> | Firmicutes; Clostridia; Clostridiales; Lachnospiraceae; Coprococcus; Coprococcus comes                                          |
| Coprococcus eutactus 2_msp_0042                                         | 0.13         | <b>0.16</b>  | 0.03         | 0.14         | <i>Lachnospiraceae</i> | Firmicutes; Clostridia; Clostridiales; Lachnospiraceae; Coprococcus; Coprococcus eutactus 2                                     |
| Dorea formicigenerans_msp_0506                                          | <b>-0.22</b> | <b>-0.15</b> | -0.04        | <b>-0.22</b> | <i>Lachnospiraceae</i> | Firmicutes; Clostridia; Clostridiales; Lachnospiraceae; Dorea; Dorea formicigenerans                                            |
| Dorea longicatena 1_msp_0307                                            | <b>-0.24</b> | -0.03        | -0.06        | <b>-0.19</b> | <i>Lachnospiraceae</i> | Firmicutes; Clostridia; Clostridiales; Lachnospiraceae; Dorea; Dorea longicatena 1                                              |
| Eisenbergiella tayi_msp_0014                                            | <b>-0.2</b>  | -0.09        | 0            | <b>-0.16</b> | <i>Lachnospiraceae</i> | Firmicutes; Clostridia; Clostridiales; Lachnospiraceae; Eisenbergiella; Eisenbergiella tayi                                     |
| Clostridium asparagiforme == lavalense_msp_0360                         | 0.09         | <b>-0.24</b> | 0.04         | 0.04         | <i>Lachnospiraceae</i> | Firmicutes; Clostridia; Clostridiales; Lachnospiraceae; Lachnoclostridium; Clostridium asparagiforme == lavalense               |
| Clostridium bolteae_msp_0009                                            | -0.04        | <b>-0.26</b> | -0.02        | -0.07        | <i>Lachnospiraceae</i> | Firmicutes; Clostridia; Clostridiales; Lachnospiraceae; Lachnoclostridium; Clostridium bolteae                                  |
| Clostridium clostridioforme 1_msp_0020                                  | -0.09        | -0.09        | <b>-0.15</b> | -0.08        | <i>Lachnospiraceae</i> | Firmicutes; Clostridia; Clostridiales; Lachnospiraceae; Lachnoclostridium; Clostridium clostridioforme 1                        |
| Clostridium glycyrrhizinilyticum_msp_0510                               | <b>-0.16</b> | -0.14        | -0.12        | <b>-0.2</b>  | <i>Lachnospiraceae</i> | Firmicutes; Clostridia; Clostridiales; Lachnospiraceae; Lachnoclostridium; Clostridium glycyrrhizinilyticum                     |
| Clostridium symbiosum_msp_0086                                          | -0.01        | <b>-0.17</b> | -0.08        | -0.05        | <i>Lachnospiraceae</i> | Firmicutes; Clostridia; Clostridiales; Lachnospiraceae; Lachnoclostridium; Clostridium symbiosum                                |
| unclassified Lachnoclostridium_msp_0049                                 | <b>0.22</b>  | -0.06        | 0.03         | <b>0.18</b>  | <i>Lachnospiraceae</i> | Firmicutes; Clostridia; Clostridiales; Lachnospiraceae; Lachnoclostridium; unclassified Lachnoclostridium                       |

|                                                                                              |              |              |             |              |                              |                                                                                                                                                          |
|----------------------------------------------------------------------------------------------|--------------|--------------|-------------|--------------|------------------------------|----------------------------------------------------------------------------------------------------------------------------------------------------------|
| Lachnospira sp. 2789STDY5834967 / Clostridiales bacterium KLE1615 & 41_12_two_minus_msp_0572 | <b>0.15</b>  | 0.09         | <b>0.23</b> | <b>0.19</b>  | <i>Lachnospiraceae</i>       | Firmicutes; Clostridia; Clostridiales; Lachnospiraceae; Lachnospira; Lachnospira sp. 2789STDY5834967 / Clostridiales bacterium KLE1615 & 41_12_two_minus |
| Roseburia faecis_msp_0015                                                                    | <b>0.15</b>  | -0.03        | 0.11        | <b>0.17</b>  | <i>Lachnospiraceae</i>       | Firmicutes; Clostridia; Clostridiales; Lachnospiraceae; Roseburia; Roseburia faecis                                                                      |
| Roseburia hominis_msp_0071                                                                   | <b>0.19</b>  | 0.12         | <b>0.27</b> | <b>0.21</b>  | <i>Lachnospiraceae</i>       | Firmicutes; Clostridia; Clostridiales; Lachnospiraceae; Roseburia; Roseburia hominis                                                                     |
| Roseburia intestinalis_msp_0017                                                              | <b>0.19</b>  | -0.06        | 0.13        | <b>0.19</b>  | <i>Lachnospiraceae</i>       | Firmicutes; Clostridia; Clostridiales; Lachnospiraceae; Roseburia; Roseburia intestinalis                                                                |
| Roseburia sp. CAG:45 & sp. 2789STDY5608886_msp_0057                                          | <b>0.24</b>  | -0.02        | <b>0.16</b> | <b>0.23</b>  | <i>Lachnospiraceae</i>       | Firmicutes; Clostridia; Clostridiales; Lachnospiraceae; Roseburia; Roseburia sp. CAG:45 & sp. 2789STDY5608886                                            |
| Coprococcus sp. 2789STDY5608819 / Clostridium sp. CAG:264_msp_0133                           | 0.11         | <b>0.16</b>  | 0.05        | 0.14         | <i>Lachnospiraceae</i>       | Firmicutes; Clostridia; Clostridiales; Lachnospiraceae; unclassified Lachnospiraceae; Coprococcus sp. 2789STDY5608819 / Clostridium sp. CAG:264          |
| Lachnospiraceae bacterium TF01-11 / Clostridium sp. CAG:122_msp_0175                         | <b>0.14</b>  | <b>0.16</b>  | 0.14        | <b>0.17</b>  | <i>Lachnospiraceae</i>       | Firmicutes; Clostridia; Clostridiales; Lachnospiraceae; unclassified Lachnospiraceae; Lachnospiraceae bacterium TF01-11 / Clostridium sp. CAG:122        |
| unclassified Lachnospiraceae_msp_0254                                                        | <b>-0.17</b> | -0.14        | -0.14       | <b>-0.21</b> | <i>Lachnospiraceae</i>       | Firmicutes; Clostridia; Clostridiales; Lachnospiraceae; unclassified Lachnospiraceae; unclassified Lachnospiraceae                                       |
| unclassified Lachnospiraceae_msp_0296                                                        | <b>0.32</b>  | <b>0.2</b>   | <b>0.26</b> | <b>0.35</b>  | <i>Lachnospiraceae</i>       | Firmicutes; Clostridia; Clostridiales; Lachnospiraceae; unclassified Lachnospiraceae; unclassified Lachnospiraceae                                       |
| unclassified Lachnospiraceae_msp_0780                                                        | 0.1          | 0.14         | <b>0.16</b> | 0.12         | <i>Lachnospiraceae</i>       | Firmicutes; Clostridia; Clostridiales; Lachnospiraceae; unclassified Lachnospiraceae; unclassified Lachnospiraceae                                       |
| unclassified Lachnospiraceae_msp_0930                                                        | 0.13         | 0.02         | <b>0.2</b>  | 0.11         | <i>Lachnospiraceae</i>       | Firmicutes; Clostridia; Clostridiales; Lachnospiraceae; unclassified Lachnospiraceae; unclassified Lachnospiraceae                                       |
| unclassified Lachnospiraceae_msp_1641                                                        | <b>0.18</b>  | 0.03         | 0.12        | <b>0.15</b>  | <i>Lachnospiraceae</i>       | Firmicutes; Clostridia; Clostridiales; Lachnospiraceae; unclassified Lachnospiraceae; unclassified Lachnospiraceae                                       |
| Oscillibacter sp. 57_20_msp_0903                                                             | 0.07         | <b>0.19</b>  | <b>0.21</b> | 0.12         | <i>Oscillospiraceae</i>      | Firmicutes; Clostridia; Clostridiales; Oscillospiraceae; Oscillibacter; Oscillibacter sp. 57_20                                                          |
| Oscillibacter sp. ER4 / Firmicutes bacterium CAG:129_59_24_msp_0763                          | 0.07         | <b>0.17</b>  | <b>0.16</b> | 0.08         | <i>Oscillospiraceae</i>      | Firmicutes; Clostridia; Clostridiales; Oscillospiraceae; Oscillibacter; Oscillibacter sp. ER4 / Firmicutes bacterium CAG:129_59_24                       |
| unclassified Oscillibacter_msp_1062                                                          | -0.02        | <b>0.31</b>  | -0.02       | 0.02         | <i>Oscillospiraceae</i>      | Firmicutes; Clostridia; Clostridiales; Oscillospiraceae; Oscillibacter; unclassified Oscillibacter                                                       |
| unclassified Oscillibacter_msp_1143                                                          | 0.05         | <b>0.18</b>  | 0.05        | 0.11         | <i>Oscillospiraceae</i>      | Firmicutes; Clostridia; Clostridiales; Oscillospiraceae; Oscillibacter; unclassified Oscillibacter                                                       |
| Firmicutes bacterium CAG:129_msp_0777                                                        | <b>0.18</b>  | 0.09         | 0.14        | <b>0.18</b>  | <i>Oscillospiraceae</i>      | Firmicutes; Clostridia; Clostridiales; Oscillospiraceae; unclassified Oscillospiraceae; Firmicutes bacterium CAG:129                                     |
| Intestinibacter bartlettii_msp_0621                                                          | <b>-0.24</b> | -0.04        | -0.1        | <b>-0.23</b> | <i>Peptostreptococcaceae</i> | Firmicutes; Clostridia; Clostridiales; Peptostreptococcaceae; Intestinibacter; Intestinibacter bartlettii                                                |
| Faecalibacterium prausnitzii 3 (L2-6)_msp_0388                                               | 0.1          | 0.08         | <b>0.21</b> | <b>0.15</b>  | <i>Ruminococcaceae</i>       | Firmicutes; Clostridia; Clostridiales; Ruminococcaceae; Faecalibacterium; Faecalibacterium prausnitzii 3 (L2-6)                                          |
| Faecalibacterium prausnitzii 4 (cf. KLE1255)_msp_0389                                        | 0.02         | <b>-0.16</b> | -0.05       | -0.01        | <i>Ruminococcaceae</i>       | Firmicutes; Clostridia; Clostridiales; Ruminococcaceae; Faecalibacterium; Faecalibacterium prausnitzii 4 (cf. KLE1255)                                   |
| Faecalibacterium prausnitzii 5_msp_0399                                                      | 0.09         | <b>0.34</b>  | -0.06       | 0.11         | <i>Ruminococcaceae</i>       | Firmicutes; Clostridia; Clostridiales; Ruminococcaceae; Faecalibacterium; Faecalibacterium prausnitzii 5                                                 |
| Faecalibacterium prausnitzii 6_msp_0639                                                      | <b>0.18</b>  | 0.1          | 0.09        | <b>0.15</b>  | <i>Ruminococcaceae</i>       | Firmicutes; Clostridia; Clostridiales; Ruminococcaceae; Faecalibacterium; Faecalibacterium prausnitzii 6                                                 |
| Faecalibacterium prausnitzii 7_msp_0324                                                      | -0.14        | -0.1         | 0           | <b>-0.15</b> | <i>Ruminococcaceae</i>       | Firmicutes; Clostridia; Clostridiales; Ruminococcaceae; Faecalibacterium; Faecalibacterium prausnitzii 7                                                 |
| Faecalibacterium sp. CAG:74_msp_0034                                                         | <b>0.28</b>  | <b>0.21</b>  | <b>0.18</b> | <b>0.29</b>  | <i>Ruminococcaceae</i>       | Firmicutes; Clostridia; Clostridiales; Ruminococcaceae; Faecalibacterium; Faecalibacterium sp. CAG:74                                                    |
| Faecalibacterium sp. CAG:82_msp_0457                                                         | 0.09         | 0.08         | <b>0.2</b>  | 0.09         | <i>Ruminococcaceae</i>       | Firmicutes; Clostridia; Clostridiales; Ruminococcaceae; Faecalibacterium; Faecalibacterium sp. CAG:82                                                    |
| unclassified Faecalibacterium_msp_0265                                                       | 0.13         | <b>0.18</b>  | -0.03       | 0.14         | <i>Ruminococcaceae</i>       | Firmicutes; Clostridia; Clostridiales; Ruminococcaceae; Faecalibacterium; unclassified Faecalibacterium                                                  |

|                                                                                               |              |              |              |              |                                   |                                                                                                                                                            |
|-----------------------------------------------------------------------------------------------|--------------|--------------|--------------|--------------|-----------------------------------|------------------------------------------------------------------------------------------------------------------------------------------------------------|
| Gemmiger formicilis_msp_0374                                                                  | -0.07        | <b>-0.19</b> | -0.09        | -0.12        | <i>Ruminococcaceae</i>            | Firmicutes; Clostridia; Clostridiales; Ruminococcaceae; Gemmiger; Gemmiger formicilis                                                                      |
| unclassified Gemmiger_msp_0456                                                                | <b>0.16</b>  | 0.01         | 0.1          | <b>0.15</b>  | <i>Ruminococcaceae</i>            | Firmicutes; Clostridia; Clostridiales; Ruminococcaceae; Gemmiger; unclassified Gemmiger                                                                    |
| Phocea massiliensis_msp_1724                                                                  | <b>-0.16</b> | -0.13        | -0.12        | <b>-0.19</b> | <i>Ruminococcaceae</i>            | Firmicutes; Clostridia; Clostridiales; Ruminococcaceae; Phocea; Phocea massiliensis                                                                        |
| Eubacterium siraeum_msp_0053                                                                  | 0.06         | 0.07         | 0.14         | <b>0.15</b>  | <i>Ruminococcaceae</i>            | Firmicutes; Clostridia; Clostridiales; Ruminococcaceae; Ruminiclostridium; Eubacterium siraeum                                                             |
| Ruminococcus bicirculans_msp_0013                                                             | <b>0.2</b>   | 0.1          | 0.12         | <b>0.2</b>   | <i>Ruminococcaceae</i>            | Firmicutes; Clostridia; Clostridiales; Ruminococcaceae; Ruminococcus; Ruminococcus bicirculans                                                             |
| Ruminococcus bromii_2_msp_0045                                                                | 0.09         | <b>-0.19</b> | 0.04         | 0.03         | <i>Ruminococcaceae</i>            | Firmicutes; Clostridia; Clostridiales; Ruminococcaceae; Ruminococcus; Ruminococcus bromii 2                                                                |
| Ruminococcus faecis_msp_0152                                                                  | <b>-0.15</b> | -0.02        | -0.06        | -0.13        | <i>Ruminococcaceae</i>            | Firmicutes; Clostridia; Clostridiales; Ruminococcaceae; Ruminococcus; Ruminococcus faecis                                                                  |
| Ruminococcus lactaris_msp_0250                                                                | 0.06         | <b>0.25</b>  | 0.03         | 0.1          | <i>Ruminococcaceae</i>            | Firmicutes; Clostridia; Clostridiales; Ruminococcaceae; Ruminococcus; Ruminococcus lactaris                                                                |
| Ruminococcus sp. 2789STDY5608794 & sp. 2789STDY5834890 / Firmicutes bacterium CAG:56_msp_0164 | 0.1          | <b>0.2</b>   | <b>0.17</b>  | <b>0.16</b>  | <i>Ruminococcaceae</i>            | Firmicutes; Clostridia; Clostridiales; Ruminococcaceae; Ruminococcus; Ruminococcus sp. 2789STDY5608794 & sp. 2789STDY5834890 / Firmicutes bacterium CAG:56 |
| Ruminococcus sp. JC304_msp_1643c                                                              | <b>0.15</b>  | <b>0.15</b>  | <b>0.19</b>  | <b>0.16</b>  | <i>Ruminococcaceae</i>            | Firmicutes; Clostridia; Clostridiales; Ruminococcaceae; Ruminococcus; Ruminococcus sp. JC304                                                               |
| unclassified Ruminococcaceae_msp_0124                                                         | 0.09         | -0.04        | <b>0.19</b>  | 0.08         | <i>Ruminococcaceae</i>            | Firmicutes; Clostridia; Clostridiales; Ruminococcaceae; unclassified Ruminococcaceae; unclassified Ruminococcaceae                                         |
| Flavonifractor plautii_msp_0213                                                               | <b>-0.2</b>  | <b>-0.15</b> | <b>-0.18</b> | <b>-0.22</b> | <i>unclassified Clostridiales</i> | Firmicutes; Clostridia; Clostridiales; unclassified Clostridiales; Flavonifractor; Flavonifractor plautii                                                  |
| unclassified Flavonifractor_msp_1323                                                          | 0            | <b>0.15</b>  | 0.01         | 0.05         | <i>unclassified Clostridiales</i> | Firmicutes; Clostridia; Clostridiales; unclassified Clostridiales; Flavonifractor; unclassified Flavonifractor                                             |
| Clostridium sp. 2789STDY5608793_msp_1622                                                      | 0.09         | <b>0.3</b>   | -0.02        | 0.09         | <i>unclassified Clostridiales</i> | Firmicutes; Clostridia; Clostridiales; unclassified Clostridiales; unclassified Clostridiales; Clostridium sp. 2789STDY5608793                             |
| Clostridium sp. 2789STDY5608884_msp_0373                                                      | 0.11         | <b>0.22</b>  | 0.03         | 0.12         | <i>unclassified Clostridiales</i> | Firmicutes; Clostridia; Clostridiales; unclassified Clostridiales; unclassified Clostridiales; Clostridium sp. 2789STDY5608884                             |
| Clostridium sp. 2789STDY5834874 & sp. 2789STDY5608885_msp_0473c                               | 0.09         | 0.06         | <b>0.14</b>  | 0.12         | <i>unclassified Clostridiales</i> | Firmicutes; Clostridia; Clostridiales; unclassified Clostridiales; unclassified Clostridiales; Clostridium sp. 2789STDY5834874 & sp. 2789STDY5608885       |
| Clostridium sp. 2789STDY5834924_msp_0906                                                      | <b>0.23</b>  | <b>0.18</b>  | <b>0.33</b>  | <b>0.27</b>  | <i>unclassified Clostridiales</i> | Firmicutes; Clostridia; Clostridiales; unclassified Clostridiales; unclassified Clostridiales; Clostridium sp. 2789STDY5834924                             |
| Clostridium sp. 42_12 & CAG:75_msp_0194                                                       | 0.14         | 0.01         | <b>0.18</b>  | 0.14         | <i>unclassified Clostridiales</i> | Firmicutes; Clostridia; Clostridiales; unclassified Clostridiales; unclassified Clostridiales; Clostridium sp. 42_12 & CAG:75                              |
| Clostridium sp. CAG:138_msp_0144                                                              | <b>0.22</b>  | 0.01         | 0.14         | <b>0.17</b>  | <i>unclassified Clostridiales</i> | Firmicutes; Clostridia; Clostridiales; unclassified Clostridiales; unclassified Clostridiales; Clostridium sp. CAG:138                                     |
| Clostridium sp. CAG:169_msp_0357                                                              | <b>-0.18</b> | <b>-0.17</b> | -0.01        | <b>-0.17</b> | <i>unclassified Clostridiales</i> | Firmicutes; Clostridia; Clostridiales; unclassified Clostridiales; unclassified Clostridiales; Clostridium sp. CAG:169                                     |
| Clostridium sp. CAG:217_msp_0285                                                              | 0.11         | 0.02         | <b>0.27</b>  | <b>0.16</b>  | <i>unclassified Clostridiales</i> | Firmicutes; Clostridia; Clostridiales; unclassified Clostridiales; unclassified Clostridiales; Clostridium sp. CAG:217                                     |
| Clostridium sp. CAG:245_msp_0546                                                              | 0.05         | <b>0.23</b>  | 0.14         | <b>0.18</b>  | <i>unclassified Clostridiales</i> | Firmicutes; Clostridia; Clostridiales; unclassified Clostridiales; unclassified Clostridiales; Clostridium sp. CAG:245                                     |
| Clostridium sp. CAG:343_msp_0586                                                              | <b>0.21</b>  | 0.02         | <b>0.17</b>  | <b>0.25</b>  | <i>unclassified Clostridiales</i> | Firmicutes; Clostridia; Clostridiales; unclassified Clostridiales; unclassified Clostridiales; Clostridium sp. CAG:343                                     |
| Clostridium sp. CAG:58_msp_0129                                                               | <b>-0.15</b> | <b>-0.23</b> | -0.06        | <b>-0.18</b> | <i>unclassified Clostridiales</i> | Firmicutes; Clostridia; Clostridiales; unclassified Clostridiales; unclassified Clostridiales; Clostridium sp. CAG:58                                      |
| Clostridium sp. CAG:62_msp_0093                                                               | <b>0.28</b>  | <b>0.22</b>  | <b>0.34</b>  | <b>0.33</b>  | <i>unclassified Clostridiales</i> | Firmicutes; Clostridia; Clostridiales; unclassified Clostridiales; unclassified Clostridiales; Clostridium sp. CAG:62                                      |
| Clostridium sp. CAG:91 & sp. 2789STDY5834873_msp_0075                                         | <b>0.21</b>  | 0.06         | <b>0.17</b>  | <b>0.23</b>  | <i>unclassified Clostridiales</i> | Firmicutes; Clostridia; Clostridiales; unclassified Clostridiales; unclassified Clostridiales; Clostridium sp. CAG:91 & sp. 2789STDY5834873                |
| Clostridium sp. KLE 1755 & Clostridiales bacterium VE202-27_msp_0018                          | 0.12         | -0.05        | <b>0.18</b>  | 0.13         | <i>unclassified Clostridiales</i> | Firmicutes; Clostridia; Clostridiales; unclassified Clostridiales; unclassified Clostridiales; Clostridium sp. KLE 1755 & Clostridiales bacterium VE202-27 |

|                                                                                              |              |              |              |              |                                   |                                                                                                                                                                                                     |
|----------------------------------------------------------------------------------------------|--------------|--------------|--------------|--------------|-----------------------------------|-----------------------------------------------------------------------------------------------------------------------------------------------------------------------------------------------------|
| unclassified Clostridiales_msp_0056                                                          | -0.13        | <b>-0.16</b> | <b>-0.16</b> | <b>-0.15</b> | <i>unclassified Clostridiales</i> | Firmicutes; Clostridia; Clostridiales; unclassified Clostridiales; unclassified Clostridiales; unclassified Clostridiales                                                                           |
| unclassified Clostridiales_msp_0317                                                          | <b>-0.15</b> | -0.07        | -0.07        | -0.13        | <i>unclassified Clostridiales</i> | Firmicutes; Clostridia; Clostridiales; unclassified Clostridiales; unclassified Clostridiales; unclassified Clostridiales                                                                           |
| unclassified Clostridiales_msp_0424                                                          | <b>0.24</b>  | 0.14         | <b>0.24</b>  | <b>0.23</b>  | <i>unclassified Clostridiales</i> | Firmicutes; Clostridia; Clostridiales; unclassified Clostridiales; unclassified Clostridiales; unclassified Clostridiales                                                                           |
| unclassified Clostridiales_msp_0480                                                          | <b>0.19</b>  | 0.08         | <b>0.16</b>  | <b>0.18</b>  | <i>unclassified Clostridiales</i> | Firmicutes; Clostridia; Clostridiales; unclassified Clostridiales; unclassified Clostridiales; unclassified Clostridiales                                                                           |
| unclassified Clostridiales_msp_0591                                                          | <b>-0.15</b> | -0.13        | <b>-0.16</b> | <b>-0.17</b> | <i>unclassified Clostridiales</i> | Firmicutes; Clostridia; Clostridiales; unclassified Clostridiales; unclassified Clostridiales; unclassified Clostridiales                                                                           |
| unclassified Clostridiales_msp_0665                                                          | 0.11         | <b>0.21</b>  | <b>0.17</b>  | <b>0.18</b>  | <i>unclassified Clostridiales</i> | Firmicutes; Clostridia; Clostridiales; unclassified Clostridiales; unclassified Clostridiales; unclassified Clostridiales                                                                           |
| unclassified Clostridiales_msp_0761                                                          | <b>0.22</b>  | <b>0.18</b>  | 0.06         | <b>0.19</b>  | <i>unclassified Clostridiales</i> | Firmicutes; Clostridia; Clostridiales; unclassified Clostridiales; unclassified Clostridiales; unclassified Clostridiales                                                                           |
| unclassified Clostridiales_msp_0820                                                          | 0.14         | <b>0.16</b>  | <b>0.22</b>  | <b>0.18</b>  | <i>unclassified Clostridiales</i> | Firmicutes; Clostridia; Clostridiales; unclassified Clostridiales; unclassified Clostridiales; unclassified Clostridiales                                                                           |
| unclassified Clostridiales_msp_0931                                                          | 0.11         | <b>0.18</b>  | -0.1         | 0.08         | <i>unclassified Clostridiales</i> | Firmicutes; Clostridia; Clostridiales; unclassified Clostridiales; unclassified Clostridiales; unclassified Clostridiales                                                                           |
| unclassified Clostridiales_msp_1428                                                          | <b>0.18</b>  | <b>0.17</b>  | 0.13         | <b>0.21</b>  | <i>unclassified Clostridiales</i> | Firmicutes; Clostridia; Clostridiales; unclassified Clostridiales; unclassified Clostridiales; unclassified Clostridiales                                                                           |
| unclassified Clostridiales_msp_1533                                                          | 0.06         | <b>0.21</b>  | -0.03        | 0.05         | <i>unclassified Clostridiales</i> | Firmicutes; Clostridia; Clostridiales; unclassified Clostridiales; unclassified Clostridiales; unclassified Clostridiales                                                                           |
| Clostridia bacterium UC5.1-2E3_msp_0647                                                      | <b>0.15</b>  | -0.06        | <b>0.2</b>   | <b>0.18</b>  | <i>unclassified Clostridia</i>    | Firmicutes; Clostridia; unclassified Clostridia; unclassified Clostridia; unclassified Clostridia; Clostridia bacterium UC5.1-2E3                                                                   |
| Clostridium innocuum_msp_0103                                                                | -0.06        | <b>-0.16</b> | <b>-0.21</b> | -0.11        | <i>Erysipelotrichaceae</i>        | Firmicutes; Erysipelotrichia; Erysipelotrichales; Erysipelotrichaceae; Erysipelotrichaceae; Erysipelotrichaceae                                                                                     |
| Erysipelatoclostridium ramosum_msp_0153                                                      | 0.02         | <b>-0.17</b> | -0.06        | -0.05        | <i>Erysipelotrichaceae</i>        | Firmicutes; Erysipelotrichia; Erysipelotrichales; Erysipelotrichaceae; Erysipelotrichaceae; Erysipelotrichaceae                                                                                     |
| Turicibacter sanguinis 2_msp_1308                                                            | -0.13        | -0.04        | -0.12        | <b>-0.18</b> | <i>Erysipelotrichaceae</i>        | Firmicutes; Erysipelotrichia; Erysipelotrichales; Erysipelotrichaceae; Turicibacter; Turicibacter sanguinis 2                                                                                       |
| Phascolarctobacterium sp. CAG:207_msp_0131                                                   | 0.12         | <b>-0.16</b> | 0.02         | 0.04         | <i>Acidaminococcaceae</i>         | Firmicutes; Negativicutes; Acidaminococcales; Acidaminococcaceae; Phascolarctobacterium; Phascolarctobacterium sp. CAG:207                                                                          |
| Dialister invisus_msp_0212                                                                   | -0.06        | <b>-0.15</b> | -0.03        | -0.08        | <i>Veillonellaceae</i>            | Firmicutes; Negativicutes; Veillonellales; Veillonellaceae; Dialister; Dialister invisus                                                                                                            |
| Dialister succinatiphilus_msp_0383                                                           | 0.07         | <b>0.18</b>  | -0.09        | 0.05         | <i>Veillonellaceae</i>            | Firmicutes; Negativicutes; Veillonellales; Veillonellaceae; Dialister; Dialister succinatiphilus                                                                                                    |
| Veillonella atypica_msp_0884                                                                 | <b>0.15</b>  | -0.06        | 0.06         | 0.13         | <i>Veillonellaceae</i>            | Firmicutes; Negativicutes; Veillonellales; Veillonellaceae; Veillonella; Veillonella atypica                                                                                                        |
| Veillonella rogosae_msp_1219                                                                 | <b>0.18</b>  | 0.01         | <b>0.17</b>  | 0.13         | <i>Veillonellaceae</i>            | Firmicutes; Negativicutes; Veillonellales; Veillonellaceae; Veillonella; Veillonella rogosae                                                                                                        |
| Firmicutes bacterium CAG:103_msp_0654                                                        | -0.02        | 0.03         | <b>0.15</b>  | -0.02        | <i>unclassified Firmicutes</i>    | Firmicutes; unclassified Firmicutes; unclassified Firmicutes; unclassified Firmicutes; unclassified Firmicutes; Firmicutes bacterium CAG:103                                                        |
| Firmicutes bacterium CAG:124_msp_0205                                                        | 0.12         | 0.1          | <b>0.22</b>  | 0.13         | <i>unclassified Firmicutes</i>    | Firmicutes; unclassified Firmicutes; unclassified Firmicutes; unclassified Firmicutes; unclassified Firmicutes; unclassified Firmicutes; Firmicutes bacterium CAG:124                               |
| Firmicutes bacterium CAG:212 / Clostridium sp. 2789STDY5834871_msp_0581                      | <b>-0.16</b> | 0.01         | 0.02         | -0.09        | <i>unclassified Firmicutes</i>    | Firmicutes; unclassified Firmicutes; unclassified Firmicutes; unclassified Firmicutes; unclassified Firmicutes; Firmicutes bacterium CAG:212 / Clostridium sp. 2789STDY5834871                      |
| Firmicutes bacterium CAG:41 / Clostridium sp. 2789STDY5834935 & sp. 2789STDY5608853_msp_0468 | <b>0.17</b>  | 0.04         | <b>0.23</b>  | <b>0.2</b>   | <i>unclassified Firmicutes</i>    | Firmicutes; unclassified Firmicutes; unclassified Firmicutes; unclassified Firmicutes; unclassified Firmicutes; Firmicutes bacterium CAG:41 / Clostridium sp. 2789STDY5834935 & sp. 2789STDY5608853 |
| Firmicutes bacterium CAG:95_msp_0060                                                         | <b>0.23</b>  | <b>0.19</b>  | 0.05         | <b>0.21</b>  | <i>unclassified Firmicutes</i>    | Firmicutes; unclassified Firmicutes; unclassified Firmicutes; unclassified Firmicutes; unclassified Firmicutes; Firmicutes bacterium CAG:95                                                         |
| unclassified Firmicutes_msp_0404                                                             | <b>0.16</b>  | <b>0.16</b>  | 0.05         | <b>0.16</b>  | <i>unclassified Firmicutes</i>    | Firmicutes; unclassified Firmicutes; unclassified Firmicutes; unclassified Firmicutes; unclassified Firmicutes; unclassified Firmicutes                                                             |

|                                                                           |              |              |             |             |                                |                                                                                                                                                      |
|---------------------------------------------------------------------------|--------------|--------------|-------------|-------------|--------------------------------|------------------------------------------------------------------------------------------------------------------------------------------------------|
| unclassified Firmicutes_msp_0425                                          | 0.09         | <b>-0.16</b> | 0.07        | 0.04        | <i>unclassified Firmicutes</i> | Firmicutes; unclassified Firmicutes; unclassified Firmicutes; unclassified Firmicutes; unclassified Firmicutes; unclassified Firmicutes              |
| unclassified Firmicutes_msp_0596                                          | <b>0.16</b>  | 0.13         | 0.12        | <b>0.16</b> | <i>unclassified Firmicutes</i> | Firmicutes; unclassified Firmicutes; unclassified Firmicutes; unclassified Firmicutes; unclassified Firmicutes; unclassified Firmicutes              |
| unclassified Firmicutes_msp_0622                                          | 0.13         | 0.09         | <b>0.25</b> | <b>0.17</b> | <i>unclassified Firmicutes</i> | Firmicutes; unclassified Firmicutes; unclassified Firmicutes; unclassified Firmicutes; unclassified Firmicutes; unclassified Firmicutes              |
| unclassified Firmicutes_msp_0679                                          | <b>0.21</b>  | <b>0.15</b>  | 0.1         | <b>0.21</b> | <i>unclassified Firmicutes</i> | Firmicutes; unclassified Firmicutes; unclassified Firmicutes; unclassified Firmicutes; unclassified Firmicutes; unclassified Firmicutes              |
| unclassified Firmicutes_msp_0723                                          | 0.07         | <b>0.16</b>  | -0.02       | 0.05        | <i>unclassified Firmicutes</i> | Firmicutes; unclassified Firmicutes; unclassified Firmicutes; unclassified Firmicutes; unclassified Firmicutes; unclassified Firmicutes              |
| unclassified Firmicutes_msp_0874                                          | <b>0.17</b>  | <b>0.18</b>  | 0.05        | <b>0.2</b>  | <i>unclassified Firmicutes</i> | Firmicutes; unclassified Firmicutes; unclassified Firmicutes; unclassified Firmicutes; unclassified Firmicutes; unclassified Firmicutes              |
| unclassified Firmicutes_msp_1302                                          | <b>0.17</b>  | <b>0.22</b>  | <b>0.19</b> | <b>0.21</b> | <i>unclassified Firmicutes</i> | Firmicutes; unclassified Firmicutes; unclassified Firmicutes; unclassified Firmicutes; unclassified Firmicutes; unclassified Firmicutes              |
| unclassified Firmicutes_msp_1342                                          | 0.09         | <b>0.23</b>  | -0.03       | 0.12        | <i>unclassified Firmicutes</i> | Firmicutes; unclassified Firmicutes; unclassified Firmicutes; unclassified Firmicutes; unclassified Firmicutes; unclassified Firmicutes              |
| Parasutterella excrementihominis_msp_0145                                 | <b>0.23</b>  | 0.11         | <b>0.17</b> | <b>0.24</b> | <i>Sutterellaceae</i>          | Proteobacteria; Betaproteobacteria; Burkholderiales; Sutterellaceae; Parasutterella; Parasutterella excrementihominis                                |
| Bilophila wadsworthia_msp_0110                                            | <b>-0.16</b> | -0.02        | -0.1        | -0.13       | <i>Desulfovibrionaceae</i>     | Proteobacteria; Deltaproteobacteria; Desulfovibrionales; Desulfovibrionaceae; Bilophila; Bilophila wadsworthia                                       |
| Acinetobacter sp. N54.MGS-139 / Proteobacteria bacterium CAG:139_msp_0202 | <b>0.15</b>  | 0.03         | -0.04       | 0.13        | <i>Moraxellaceae</i>           | Proteobacteria; Gammaproteobacteria; Pseudomonadales; Moraxellaceae; Acinetobacter; Acinetobacter sp. N54.MGS-139 / Proteobacteria bacterium CAG:139 |
| Akkermansia muciniphila_msp_0025                                          | <b>0.19</b>  | 0.05         | <b>0.22</b> | <b>0.18</b> | <i>Akkermansiaceae</i>         | Verrucomicrobia; Verrucomicrobiae; Verrucomicrobiales; Akkermansiaceae; Akkermansia; Akkermansia muciniphila                                         |

Numbers in bold indicate significance at the FDR<0.05 level.
